# Supplementary material for: An exploration of the effect of proprioceptive knee bracing on biomechanics during a badminton lunge to the net, and the implications to injury mechanisms
Source: PeerJ. 2018 Dec 20;6:e6033. doi: 10.7717/peerj.6033 (PMC6304263; doi:10.7717/peerj.6033)
Supplement: Supplemental Information 1 — Kinetic raw data. [file peerj-06-6033-s001.xlsx]

## Sheet: Sb2_NB_Force_BH_Pre
		a	b	c	a	b	c	a	b	c	a	b	c	a	b	c	a	b	c	a	b	c	a	b	c	a	b	c	a	b	c	a	b	c	a
	1	2406.32	92103.5	2.14011		2537.66	86980.3	2.22831			2007.91	69690.2	1.95703		2062.19	63346.7	1.94232			2012.56	65054.1	2.11543		2356.97	88433	2.10567			2012.56	65054.1	2.11543		2041.62	66718.1	1.96408
	2	1608.45	40506	2.50529		1613.27	41542.6	2.23186			2192.34	64886.9	2.22825		1747.57	41822.8	1.23504			1801.09	49026.2	2.36455		1549.23	40386	1.90314			1806.73	54740.2	1.25422		2260.78	56616.4	0.555417
	3	1663.88	83698	2.66644		1209.27	53050.8	1.4202			1425.9	72851.1	2.1531		1571.41	42651.9	2.13996			1543.73	78881.3	2.47273		1261.68	66308.9	2.48537			1388.74	33629	2.38253		1516.91	43365.7	2.29382
	4	1138.62	53992.2	2.41286		1383.6	64505.9	2.08038			1132.28	44412.5	1.96024		1096.83	45067.3	2.14123			1008.28	46609.1	2.32025		1368.35	63234.1	2.3348			1164.63	41153.1	1.88829		1126.48	37182.9	1.8816
	5	1395.79	72793.3	2.60418		1312.12	66752.4	2.6336			1199.51	61332.8	2.59734		1134.85	57138.4	2.56012			1387.69	69836.5	2.40077		1335.26	66988.5	2.86261			1408.41	71652.3	2.62		1187.76	59301	2.50595
	6	1154.36	30224.9	2.01685		1688.87	53409.7	1.07297			1677.31	50536.5	1.88868		1259.94	33153.7	1.77574			730.778	25793.5	1.83451		438.546	9778.84	1.62676			1531.77	57803.3	1.8907		1080.71	47840.6	1.70236
	7	1887.41	67554.5	2.62595		1610.77	44157.8	2.56578			1873.06	62423.7	2.29737		1796.7	48305.9	2.21639			1621.88	60369.6	2.22599		1687.83	48001.6	2.15153			2024.53	68707.6	2.23219		2203.97	58970.9	2.29465
	8
	9	1078.22	56400.4	1.92974		1154.5	29336.2	2.36076			939.79	23026.4	2.40087		908.706	24050.3	2.55818			748.625	38376.5	2.44186		1168.32	38716.7	2.42592			959.801	27010.4	2.46675		810.806	37752.3	2.32546
	10	866.073	18322.1	1.84838		614.452	13133.2	1.6925			753.005	17574.1	1.86421		758.842	17526.7	1.95544			835.516	17802.8	2.01612		697.456	15946.5	2.1043			862.938	38598.2	2.06243		956.719	29374	2.14411
	11	580.072	19938.8	2.01353		686.217	17634.8	1.99076			1008.86	24684.3	2.29547		936.224	23551.2	2.29473			1099.4	24202.8	2.14299		1029.2	22307	2.21179			1181.48	31824.2	2.17049		870.995	22114.6	2.08513
	12										1684.77	65436.6	2.15454		1349.63	57436.9	2.09182												1581.22	46110.6	2.12057		594.703	23231.8	2.06896
	13	1436.62	48853	2.79416		1351.34	42170.9	2.65219												1833.06	53468.6	2.30246		1066.6	28927.3	2.12615
	14
	15	881.096	38194.4	1.92211		1039.99	49974.6	2.04672			1009.06	45131	2.08632		911.407	40137.4	1.6984			934.554	47263.7	1.77405		901.751	29164.5	1.70603			972.214	46802.1	1.90447		925.562	44471.7	1.86476
	16	2053.54	109223	2.22236		1469.99	45631.9	2.09475			1255.29	43217.1	1.91832		1936.97	76369	2.04406			1946.04	91092.7	2.20966		1391.77	37017.3	2.11892			1548.45	38736.2	1.89537		1690.76	54936.2	1.84184
	17	1140.12	29619.8	2.09112		1189.87	33856.1	2.21576			1487.62	40004.7	2.21057		1274.45	39179.9	2.14771			1360.83	46689.1	1.95416		1297.57	42533.3	1.94908			1606.81	51718.2	1.93357		1578.64	55417.7	1.94902
	18	1128.37	21281.7	2.23218		1025.63	23572.3	1.89057			680.785	17264.2	2.09704		945.155	16719.6	2.00784			886.259	17089.3	2.24792		1096.22	23284.4	2.13407			798.863	14849.9	1.81433		895.657	16426	2.24311
	19	992.332	28087.6	2.31458		898.728	30124.9	1.91074			1142.92	45631.3	2.68265		1225.32	40916.5	2.46391			102.985	195.094	2.10182		187.969	6984.59	2.05785			758.493	36604.8	2.60798		931.997	43353.3	2.58549
	20	716.429	10761.3	1.99121		648.633	17072.7	1.91503			914.969	12649.5	1.77421		817.778	21883	1.88337			925.643	16355.4	1.84975		981.204	24871.8	1.83055			862.457	37455.6	1.65068		815.427	40014.8	1.70376
