# Supplementary material for: An exploration of the effect of proprioceptive knee bracing on biomechanics during a badminton lunge to the net, and the implications to injury mechanisms
Source: PeerJ. 2018 Dec 20;6:e6033. doi: 10.7717/peerj.6033 (PMC6304263; doi:10.7717/peerj.6033)
Supplement: Supplemental Information 2 — Kinematic raw data. [file peerj-06-6033-s002.xlsx]

## Sheet: Hoja1
	a	b	c	a	b	c	a	b	c	a	b	c	a	b	c	a	b	c	a	b	c	a	b	c	a	b	c	a	b	c	a	b	c	a	b	c	a	b	c	a	b	c	a	b	c	a	b	c	a
Sb_1	94,98269	-44,17239	139,15508		32,53977	-3,19102	35,73079		4,77833	-8,69552	13,47385		104,43858	-39,57674	144,01532		34,12873	-6,12438	40,25311		2,82886	-13,82109	16,64995		124,35342	-29,32784	153,68126		27,09092	0,75911	26,33181		3,77084	-13,33621	17,10705		124,84406	-37,02478	161,86884		20,48456	-0,12123	20,60579		1,53447	-14,94528	16,47975
Sb_2	79,85649	-51,80912	131,66561		14,78627	-23,84678	38,63305		4,99515	-9,88904	14,88419		107,21256	-10,7335	117,94606		7,70896	-31,53321	39,24217		6,63181	-6,0997	12,73151		122,53457	-7,4422	129,97677		9,71176	-37,72487	47,43663		9,9176	-18,88809	28,80569		103,71027	-30,58336	134,29363		12,38302	-39,17872	51,56174		9,90207	-15,53779	25,43986
Sb_3	75,6943	-28,34543	104,03973		24,77937	-4,22272	29,00209		9,25265	-0,93528	10,18793		75,85013	-15,86111	91,71124		27,88021	0,17684	27,70337		6,92672	-1,47241	8,39913		110,38552	-17,51882	127,90434		29,53095	-5,77587	35,30682		6,8651	0,26867	6,59643		113,91177	-12,12291	126,03468		44,06471	-5,07709	49,1418		12,06028	-2,69337	14,75365
Sb_4	79,4163	-33,66355	113,07985		3,21243	-15,26076	18,47319		4,6792	-5,52269	10,20189		82,33115	-44,83472	127,16587		4,4499	-15,69117	20,14107		6,04089	-3,77577	9,81666		72,60979	-39,03348	111,64327		7,10048	-16,15454	23,25502		3,45528	-3,0778	6,53308		77,82185	-43,99748	121,81933		7,54218	-12,22536	19,76754		4,90867	-1,08399	5,99266
Sb_5	26,57564	-11,81169	38,38733		2,89268	-3,12806	6,02074		4,48207	-3,56693	8,049		10,8374	-6,95028	17,78768		1,11288	-3,79571	4,90859		4,43431	-1,71284	6,14715		13,62208	-11,2721	24,89418		2,07664	-2,86725	4,94389		3,21194	-2,73413	5,94607		8,34932	-9,43536	17,78468		2,07504	-3,16321	5,23825		2,83695	-2,3841	5,22105
Sb_6	72,52551	-16,58199	89,1075		13,28729	-12,2349	25,52219		10,15234	-0,54408	10,69642		47,23967	0,45446	46,78521		7,13764	-5,72641	12,86405		5,65301	-6,32895	11,98196		50,23547	-24,80968	75,04515		7,39395	-12,95889	20,35284		6,19779	-3,7697	9,96749		67,0892	-15,90111	82,99031		14,44237	-9,06175	23,50412		6,89637	-5,48873	12,3851
Sb_7	180,93169	5,86808	175,06361		9,48271	-54,5139	63,99661		27,65796	-21,01482	48,67278		138,05014	-38,85101	176,90115		2,56711	-22,60728	25,17439		12,68881	-8,95418	21,64299		204,43384	4,79883	199,63501		8,4231	-78,57903	87,00213		55,86448	-31,54477	87,40925		204,66502	5,73072	198,9343		6,96151	-68,22663	75,18814		51,76857	-33,55709	85,32566
Sb_8
Sb_9	66,60999	2,66974	63,94025		7,03518	-0,32842	7,3636		11,21219	0,45726	10,75493		83,39347	0,99717	82,3963		7,90933	-0,14936	8,05869		12,15452	-0,30543	12,45995		71,89144	1,14845	70,74299		8,93371	-3,52634	12,46005		10,09777	-0,583	10,68077		69,69833	-27,3739	97,07223		15,55699	-5,1266	20,68359		1,86829	-2,4197	4,28799
Sb_10	84,59747	2,73595	81,86152		7,2614	-5,67955	12,94095		14,20685	-4,90596	19,11281		91,80981	2,18967	89,62014		8,547	-3,16154	11,70854		11,59436	-8,31279	19,90715		58,27805	-15,4692	73,74725		5,46985	-12,37202	17,84187		4,88576	-3,04078	7,92654		78,36365	5,24264	73,12101		6,07784	-9,54406	15,6219		18,25173	3,6168	14,63493
Sb_11	93,38058	5,37774	88,00284		13,77114	-4,89064	18,66178		10,55689	-8,70783	19,26472		72,56206	4,13957	68,42249		13,78931	-7,38603	21,17534		10,8239	-8,34735	19,17125		93,44262	5,83935	87,60327		14,3008	-12,87949	27,18029		12,09873	-10,4536	22,55233		76,01285	4,84256	71,17029		11,40576	-7,37309	18,77885		12,2017	-6,90409	19,10579
Sb_12	3,65285	-7,51384	11,16669		2,02084	-0,14344	2,16428		1,52305	-0,53053	2,05358		3,94143	-7,53399	11,47542		1,10976	-0,4904	1,60016		0,98415	-1,0686	2,05275		1,99711	-6,59113	8,58824		0,66979	-0,45469	1,12448		1,01495	-0,66457	1,67952		28,50381	2,17229	26,33152		3,69468	0,76344	2,93124		3,8316	-1,95406	5,78566
Sb_13
Sb_14
Sb_15	32,4608	-14,38763	46,84843		8,26443	-5,87149	14,13592		0,89487	-2,67733	3,5722		34,48009	-8,57671	43,0568		7,06764	-5,89468	12,96232		2,05407	-2,51728	4,57135		59,79604	-23,71682	83,51286		15,79761	-5,66484	21,46245		1,97573	-4,87117	6,8469		66,09235	-16,46177	82,55412		16,80151	-3,66714	20,46865		1,67529	-2,44181	4,1171
Sb_16	59,47634	-6,87532	66,35166		6,48687	-3,76468	10,25155		17,73537	-4,08206	21,81743		147,77269	-15,08208	162,85477		17,26439	-5,96054	23,22493		9,26772	-1,59929	10,86701		87,85	-0,31236	88,16236		11,85667	-1,66527	13,52194		12,9844	-1,37468	14,35908		146,89236	-5,60635	152,49871		141,73941	6,95265	134,78676		62,49624	-0,19243	62,68867
Sb_17
Sb_18	113,71098	5,16724	108,54374		13,82448	3,21542	10,60906		5,38334	-4,6301	10,01344		129,46327	4,45986	125,00341		17,07675	3,00331	14,07344		3,97567	-2,06258	6,03825		80,78138	3,58904	77,19234		10,73908	3,17035	7,56873		7,99614	2,63304	5,3631		97,35847	3,46701	93,89146		8,99594	2,89826	6,09768		8,81389	-0,53978	9,35367
Sb_19	106,64124	7,84157	98,79967		7,40337	-25,14539	32,54876		9,5577	-6,22067	15,77837		98,69882	9,09318	89,60564		8,50527	-21,6473	30,15257		10,38224	-9,41858	19,80082		86,86219	10,11222	76,74997		7,59451	-6,4156	14,01011		12,97157	-6,71974	19,69131		93,50629	9,06615	84,44014		6,03416	-23,75198	29,78614		10,18173	-10,28725	20,46898
Sb_20	90,1033	4,41103	85,69227		1,5966	-18,30342	19,90002		5,302	-9,00675	14,30875		62,60052	2,74664	59,85388		2,08441	-16,12153	18,20594		4,37423	-7,46096	11,83519		8,74603	-3,71926	12,46529		1,59776	0,14191	1,45585		1,82849	-0,1939	2,02239		32,33844	-10,35016	42,6886		1,13035	-1,29416	2,42451		3,35555	-0,22719	3,58274
[truncated: 47 more columns]
