# Supplementary material for: An exploration of the effect of proprioceptive knee bracing on biomechanics during a badminton lunge to the net, and the implications to injury mechanisms
Source: PeerJ. 2018 Dec 20;6:e6033. doi: 10.7717/peerj.6033 (PMC6304263; doi:10.7717/peerj.6033)
Supplement: Supplemental Information 3 — Contact time raw data. [file peerj-06-6033-s003.xlsx]

## Sheet: Hoja1
	a	b	c	a	b	c	a	b	c	a	b	c	a	b	c	a	b	c	a	b	c	a	b	c	a	b
1	0,2	0,204		0,282	0,295			0,219	0,205		0,285	0,287			0,2	0,202		0,31	0,292			0,201	0,212		0,319	0,307
2	0,347	0,378		0,184	0,197			0,264	0,291		0,22	0,246			0,413	0,22		0,188	0,273			0,214	0,238		0,246	0,229
3	0,248	0,221		0,31	0,294			0,222	0,189		0,19	0,18			0,217	0,227		0,25	0,257			0,202	0,165		0,21	0,213
4	0,257	0,235		0,172	0,149			0,259	0,227		0,156	0,134			0,237	0,235		0,17	0,162			0,25	0,227		0,22	0,133
5	0,258	0,275		0,178	0,18			0,267	0,243		0,187	0,217			0,239	0,287		0,172	0,171			0,243	0,227		0,124	0,232
6	0,29	0,282		0,145	0,123			0,281	0,263		0,175	0,165			0,261	0,246		0,2	0,171			0,266	0,259		0,197	0,188
7	0,252	0,188		0,306	0,374			0,193	0,217		0,409	0,378			0,179	0,206		0,253	0,219			0,19	0,194		0,231	0,226
8
9	0,342	0,412		0,436	0,365			0,198	0,229		0,386	0,296			0,316	0,323		0,267	0,255			0,282	0,3		0,279	0,304
10	0,248	0,247		0,186	0,211			0,296	0,248		0,161	0,142			0,237	0,197		0,236	0,217			0,286	0,275		0,211	0,196
11	0,202	0,177		0,14	0,083			0,22	0,202		0,126	0,145			0,209	0,152		0,151	0,106			0,207	0,184		0,127	0,14
12								0,244	0,235		0,17	0,154										0,236	0,224		0,201	0,167
13	0,273	0,242		0,184	0,184										0,185	0,196		0,295	0,219
14
15	0,321	0,29		0,21	0,211			0,278	0,286		0,204	0,202			0,346	0,34		0,234	0,238			0,329	0,294		0,222	0,227
16	0,133	0,134		0,093	0,066			0,218	0,172		0,154	0,128			0,122	0,141		0,104	0,109			0,221	0,163		0,218	0,166
17	0,195	0,173		0,154	0,148			0,218	0,177		0,179	0,147			0,199	0,197		0,237	0,227			0,192	0,207		0,262	0,228
18	0,185	0,221		0,111	0,124			0,214	0,236		0,13	0,128			0,238	0,224		0,141	0,122			0,233	0,208		0,15	0,161
19	0,34	0,311		0,168	0,154			0,256	0,18		0,133	0,137			0,291	0,26		0,164	0,152			0,275	0,207		0,164	0,173
20	0,286	0,238		0,13	0,166			0,28	0,242		0,14	0,153			0,232	0,236		0,136	0,161			0,292	0,3		0,141	0,117
